# Supplementary material for: Facile carrier-assisted targeted mass spectrometric approach for proteomic analysis of low numbers of mammalian cells
Source: PubMed Central journal article supplement (PMC6123794; doi:10.1038/s42003-018-0107-6), 2018-08-06
Supplement: 42003_2018_107_MOESM1_ESM.pdf [file 42003_2018_107_MOESM1_ESM.pdf]

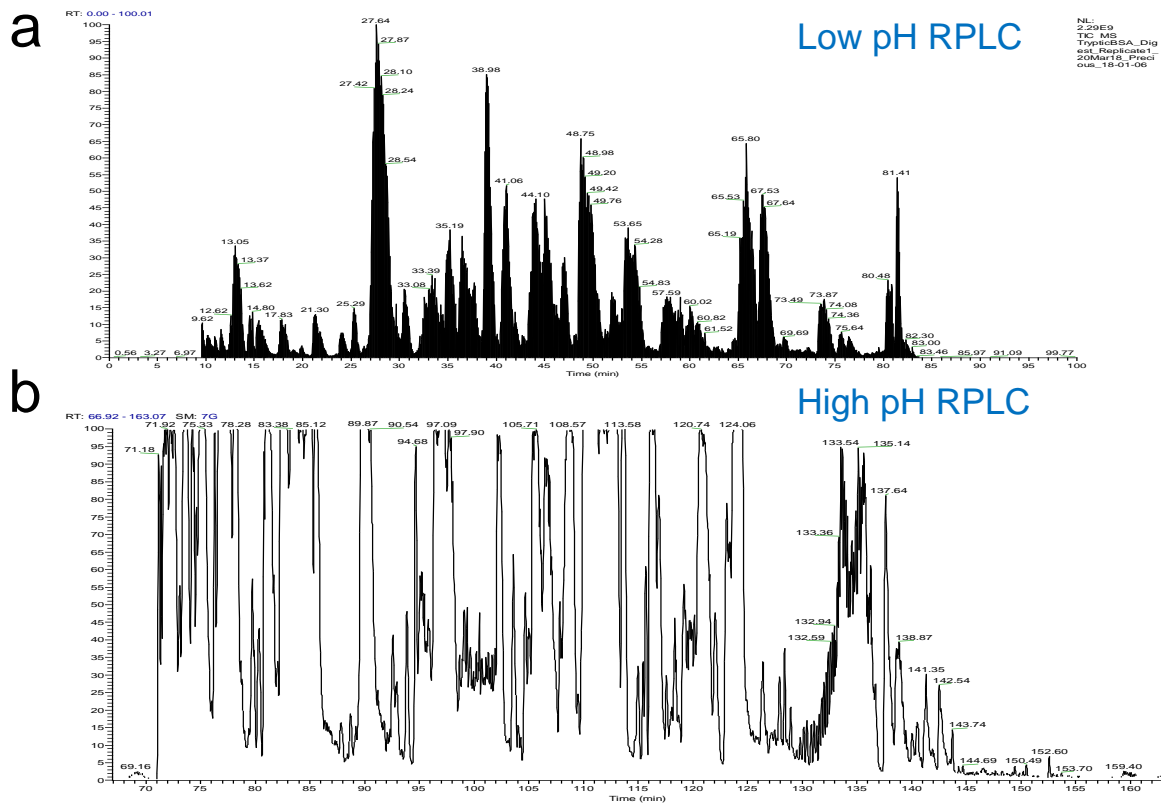

**Supplementary Figure 1.** (a) Global LC-MS/MS analysis of BSA tryptic digest with low pH RPLC separation coupled to LTQ-Orbitrap Velos MS with 100-min LC gradient time. (b) Full MS scan of BSA tryptic digest with high pH RPLC separation coupled to QQQ MS with 120-min LC gradient time. BSA tryptic peptides cover the entire LC profile in both low and high pH RPLC separations.

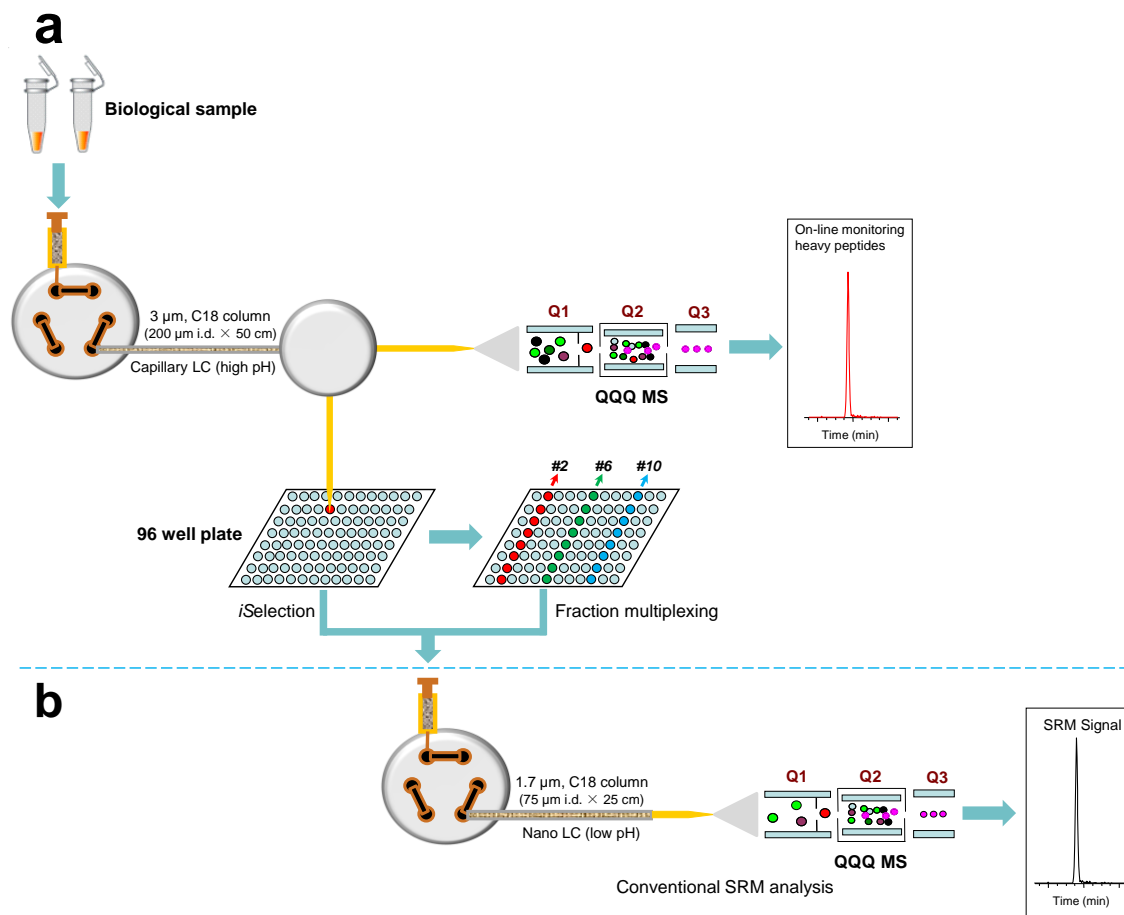

**Supplementary Figure 2.** Schematic diagram of the PRISM-SRM workflow (Shi *et al.* PNAS 109:15395-15400, 2012). **(a)** PRISM workflow.  $\sim 25$   $\mu\text{g}$  peptide sample spiked with internal standard (IS) heavy peptides was injected and separated by a high resolution reversed-phase cLC system using high pH mobile phases. The eluent from the cLC column at a flow rate of 3.3  $\mu\text{L}/\text{min}$  was split into two flowing streams via a Tee union (the split ratio of flow rates is 1:10): a small fraction (9%) of the column eluent went to a triple quadrupole mass spectrometer for on-line SRM monitoring IS peptides; a large fraction (91%) of the column eluent was automatically collected every minute into a 96-well plate during a  $\sim 100$ -min LC run. The specific target peptide fractions were selected based on the same elution times of IS being monitored by the on-line SRM (i.e., intelligent selection, termed *i*Selection) or multiplexed. **(b)** Conventional LC-SRM workflow. Following *i*Selection, a target peptide fraction with the total volume of  $\sim 20$   $\mu\text{L}$  was directly subjected to nanoLC-SRM with 16  $\mu\text{L}$  sample per injection prior to nanoLC-SRM analysis. Based on our recent studies PRISM-SRM can provide  $\sim 200$ -fold improvement in sensitivity with the quantitation dynamic range of  $\sim 7$  orders of magnitude when compared to regular LC-SRM. Its processing reproducibility has an average CV of  $\sim 10\%$  (Shi *et al.* PNAS 109:15395-15400, 2012; J Proteome Res 12:3353-3361, 2013; Anal Chem 89:9139-9146, 2017).

# EGFR: LTQLGTFEDHFLSLQR (354,000)

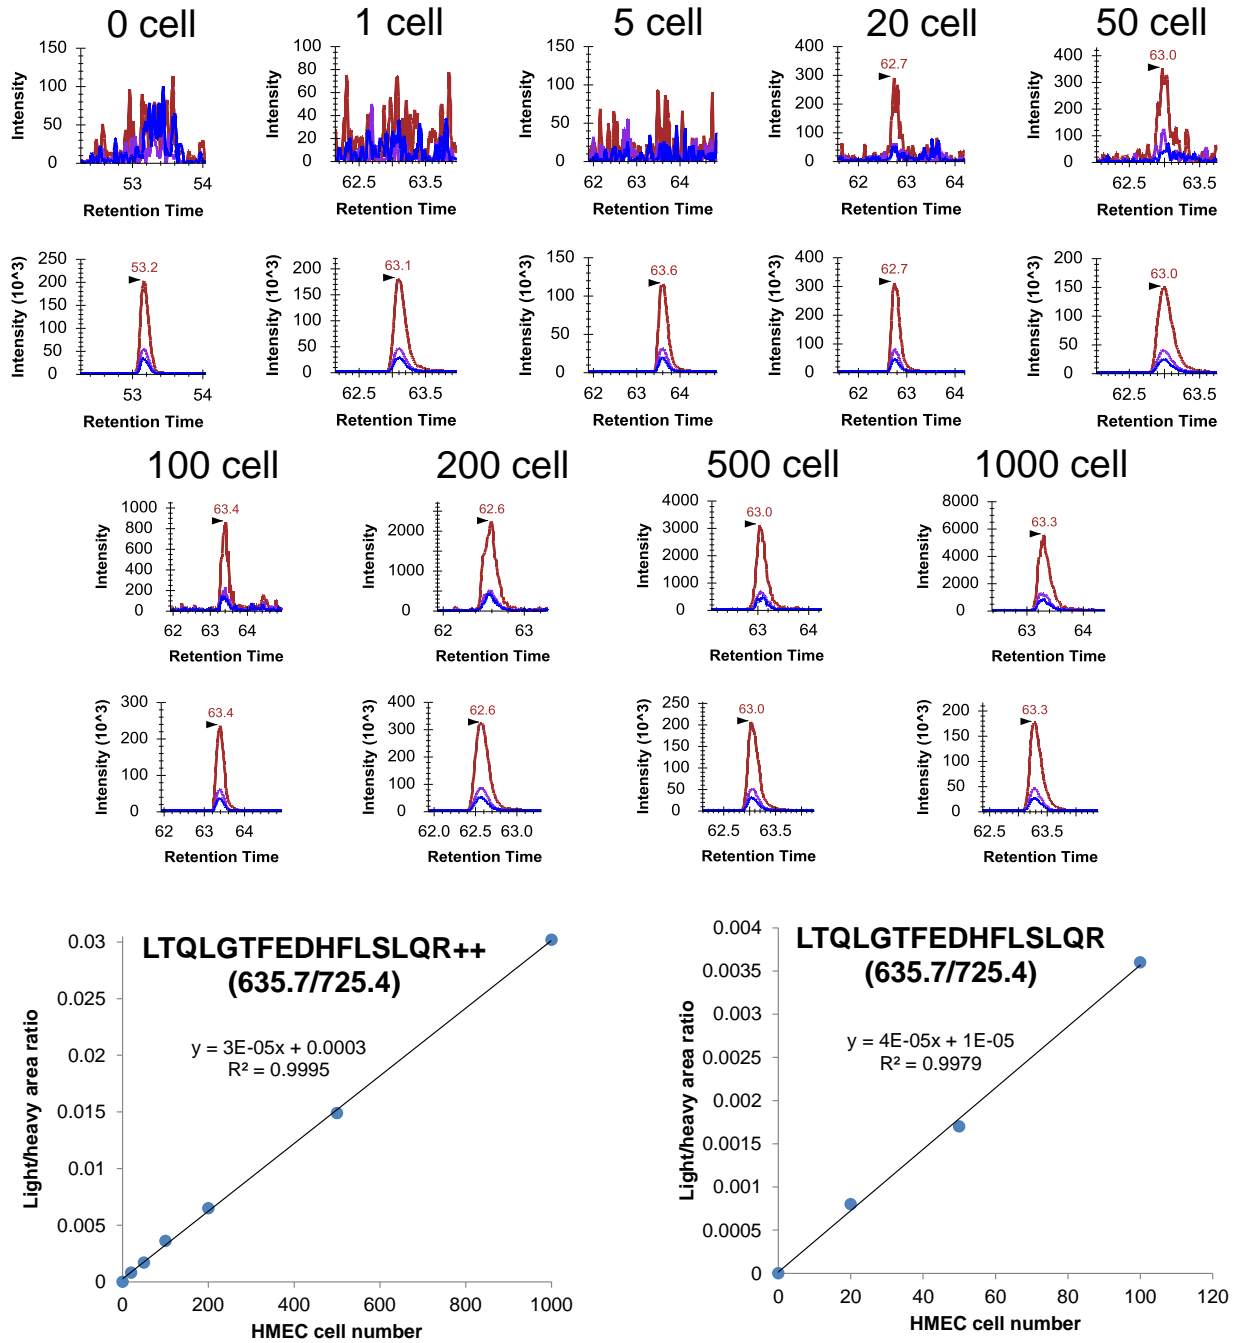

**Supplementary Figure 3.** Extracted ion chromatograms (XICs) and calibration curves of LTQLGTFEDHFLSLQR derived from EGFR in HMEC cell equivalents at the range of 0-1000. The best interference-free transition was used for generating calibration curves.

## H/K/NRAS: LVVGAGGVGK (213,232)

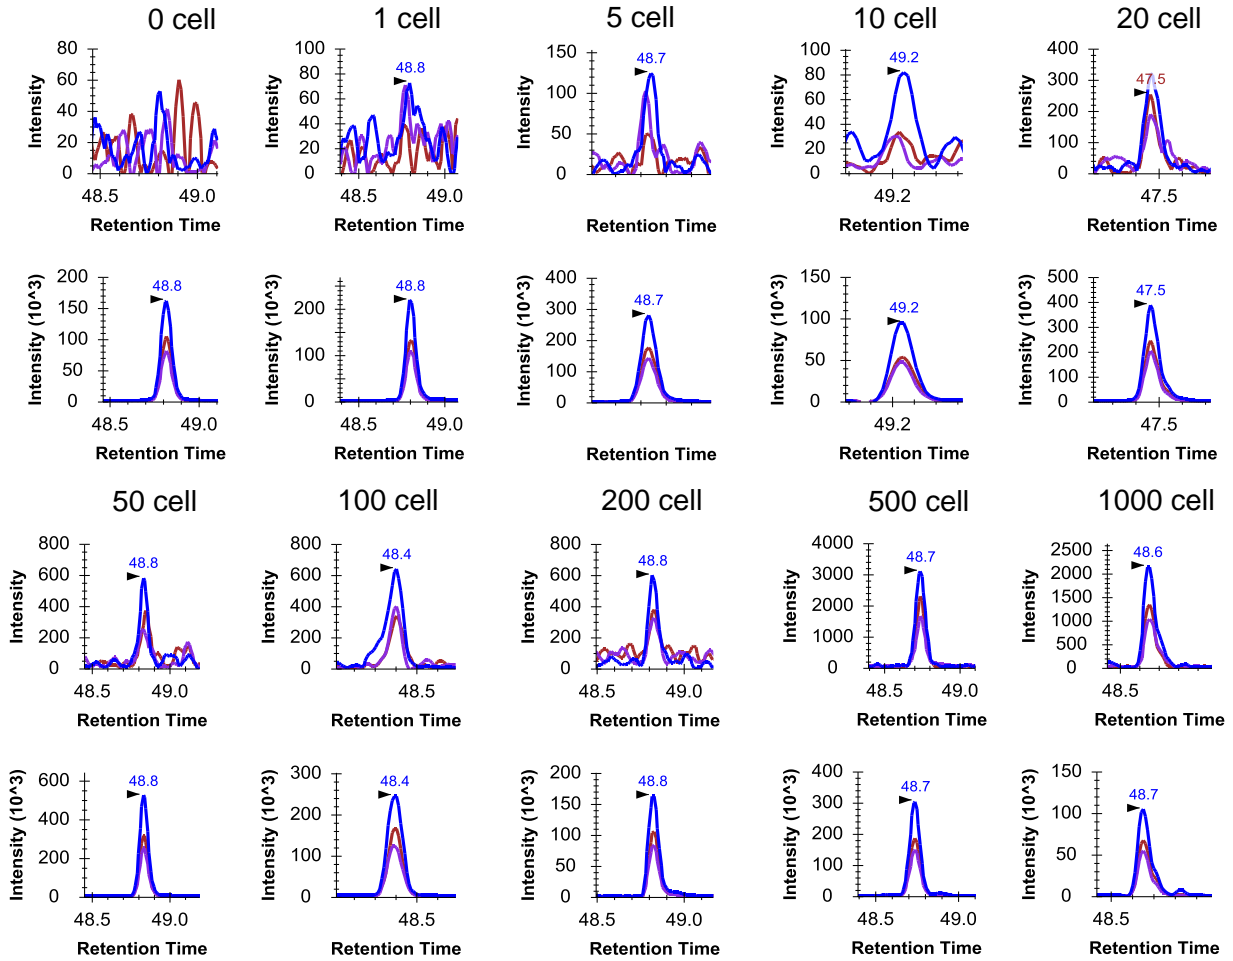

## H/K/NRAS: LVVGAGGVGK (213,232)

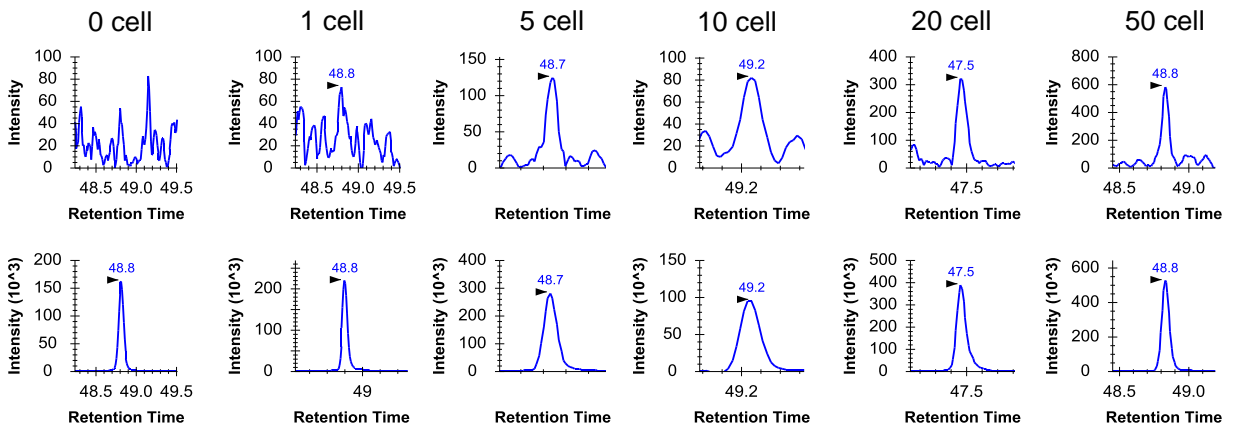

\*The best interference-free transition.

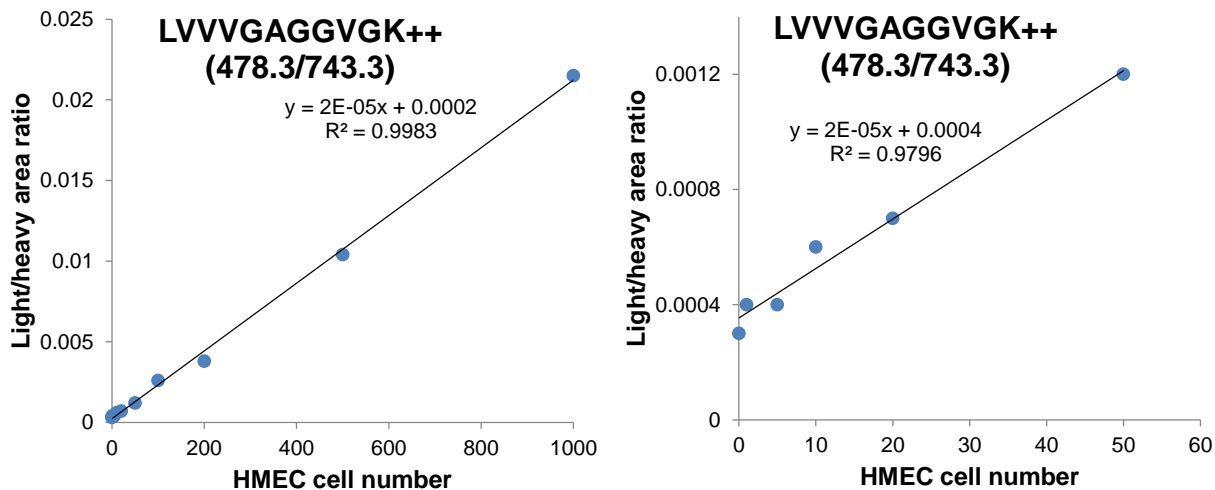

**Supplementary Figure 4.** XICs and calibration curves of LVVVGAGGVGK derived from H/K/NRAS in HMEC cell equivalents at the range of 0-1000. The best interference-free transition was used for generating calibration curves.

**K/NRAS: SYGIPFIETSAK (177,780)**

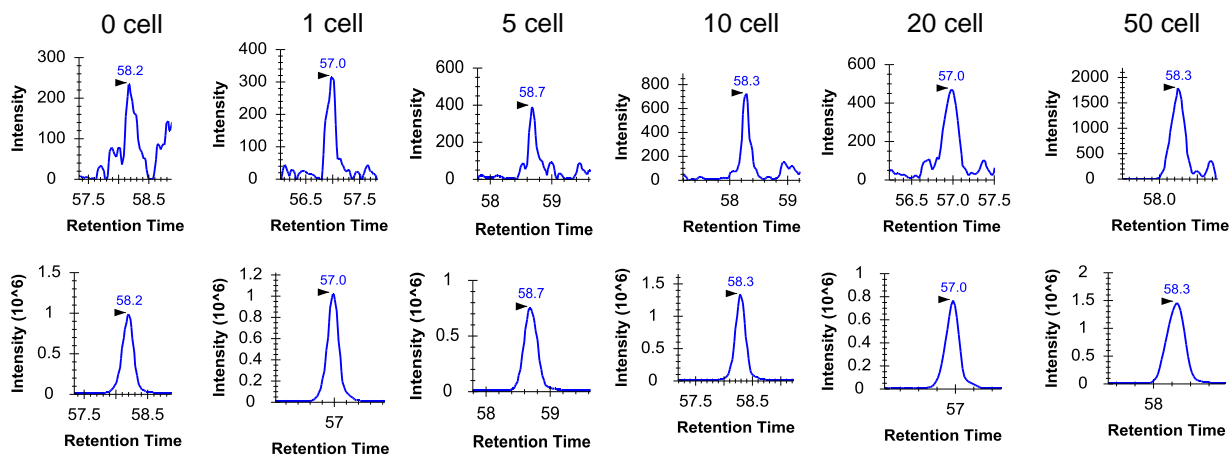

\*The best interference-free transition.

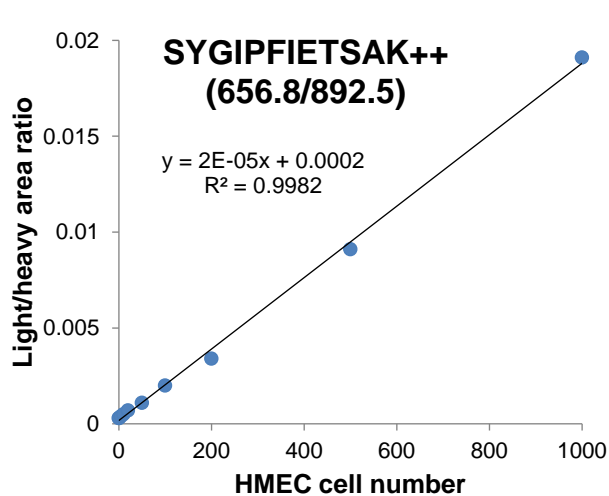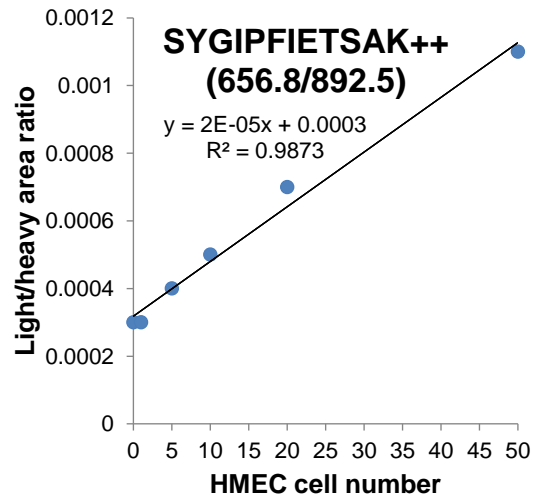

**Supplementary Figure 5.** XICs and calibration curves of SYGIPFIETSAK derived from K/NRAS in HMEC cell equivalents at the range of 0-1000. The best interference-free transition was used for generating calibration curves.

**NRAS: SFADINLYR (82,045)**

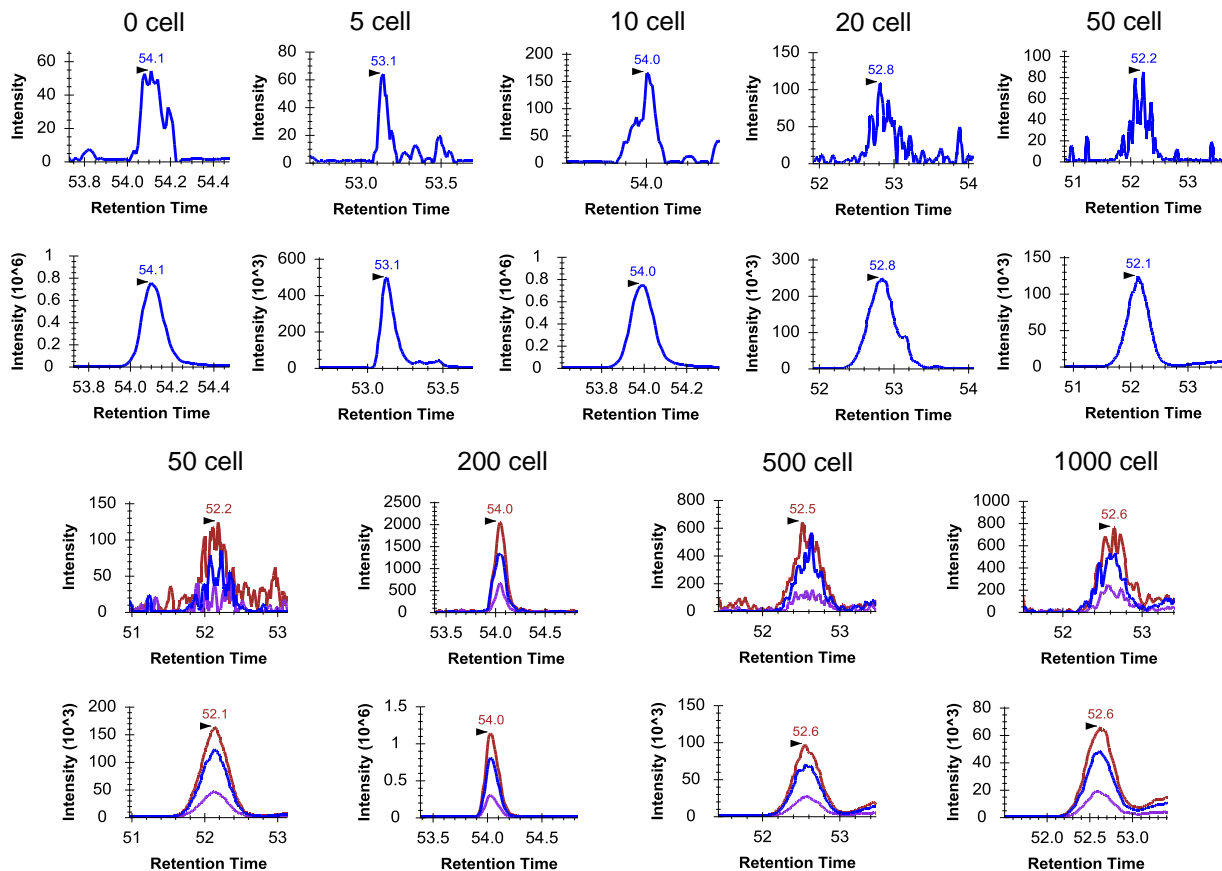

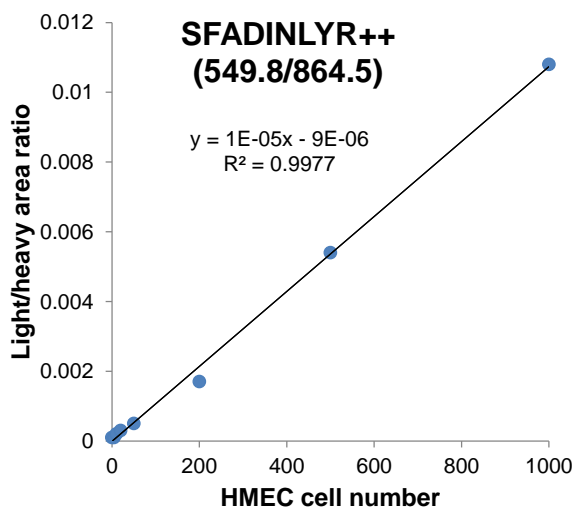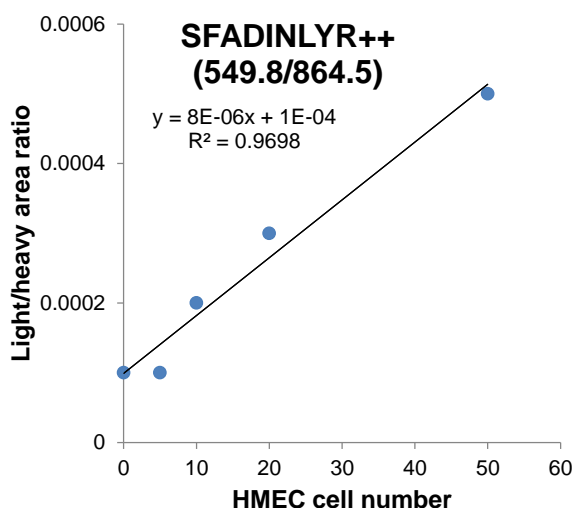

**Supplementary Figure 6.** XICs and calibration curves of SFADINLYR derived from NRAS in HMEC cell equivalents at the range of 0-1000. The best interference-free transition was used for generating calibration curves.

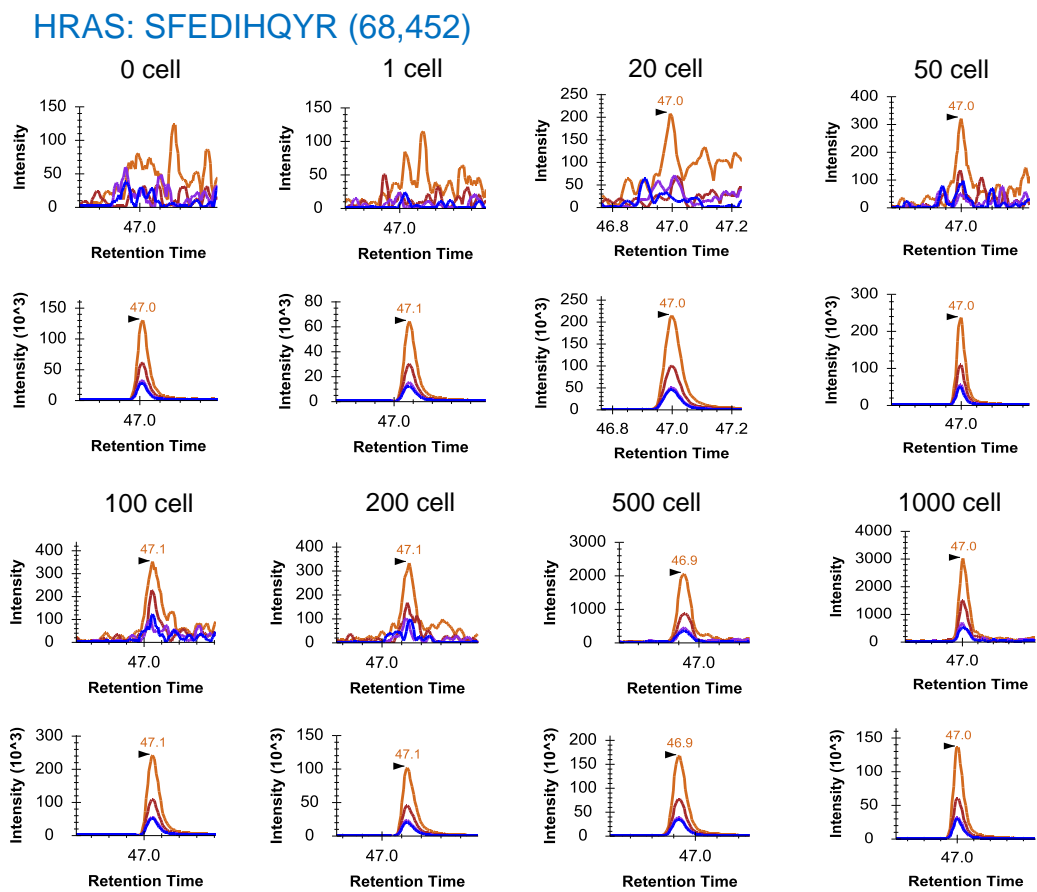

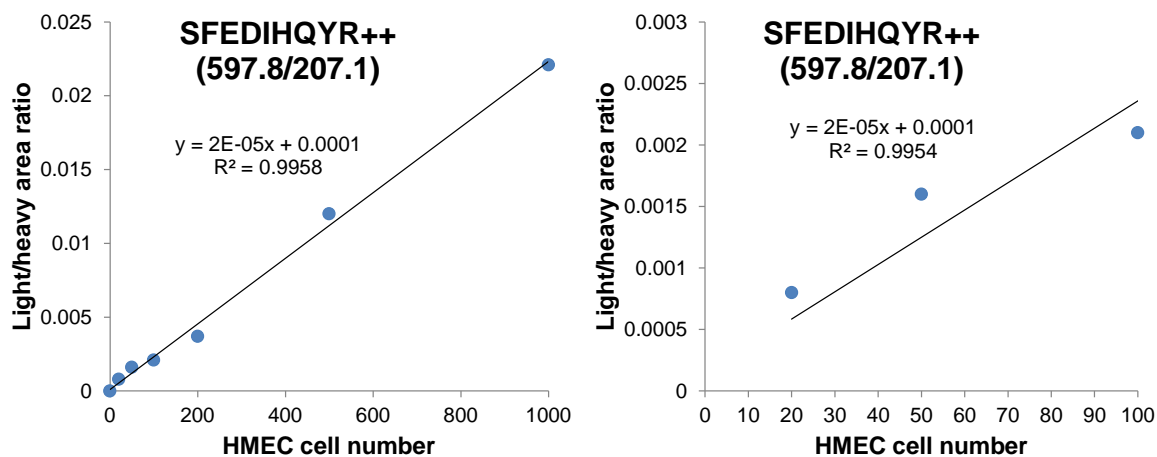

**Supplementary Figure 7.** XICs and calibration curves of SFEDIHQYR derived from HRAS in HMEC cell equivalents at the range of 0-1000. The best interference-free transition was used for generating calibration curves.

**ADAM17: NIYLNGLTSTK (36,080)**

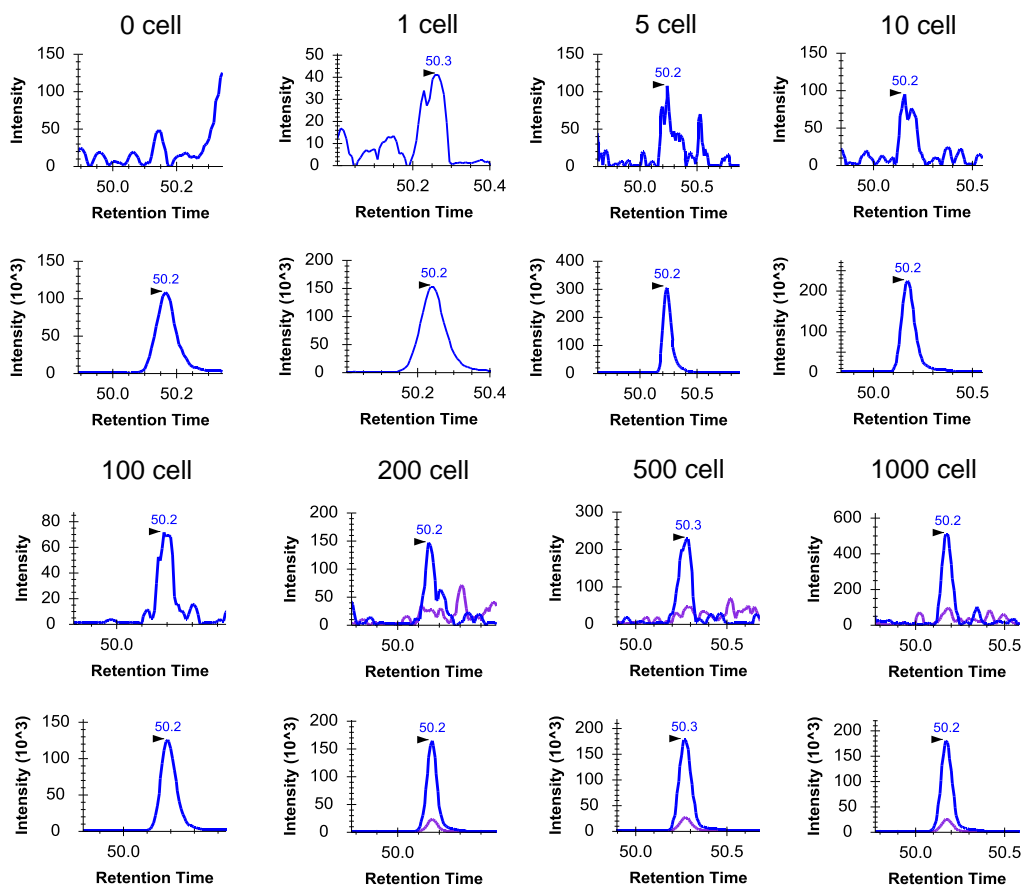



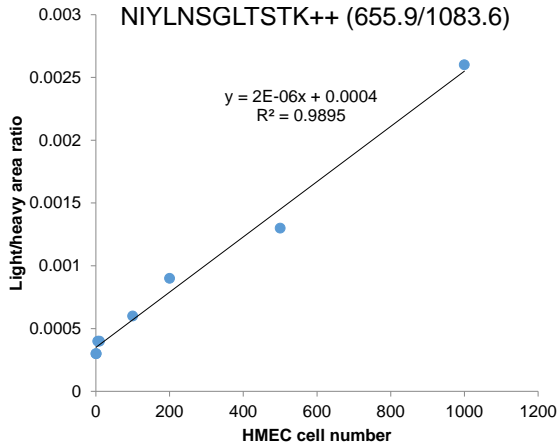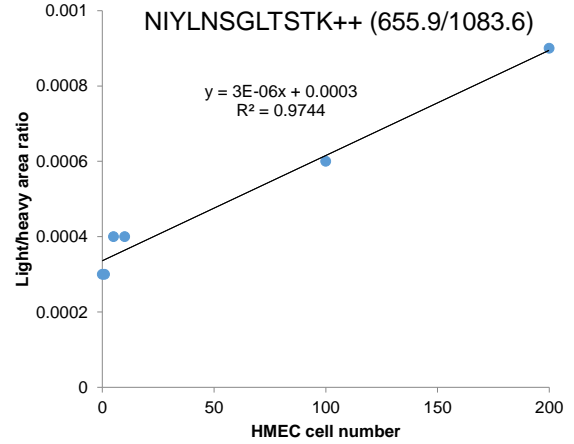

**Supplementary Figure 8.** XICs and calibration curves of NIYLNGLTSTK derived from ADAM17 in HMEC cell equivalents at the range of 0-1000. The best interference-free transition was used for generating calibration curves.

### SHC1: EAISLVCEAVPGAK (25,055)

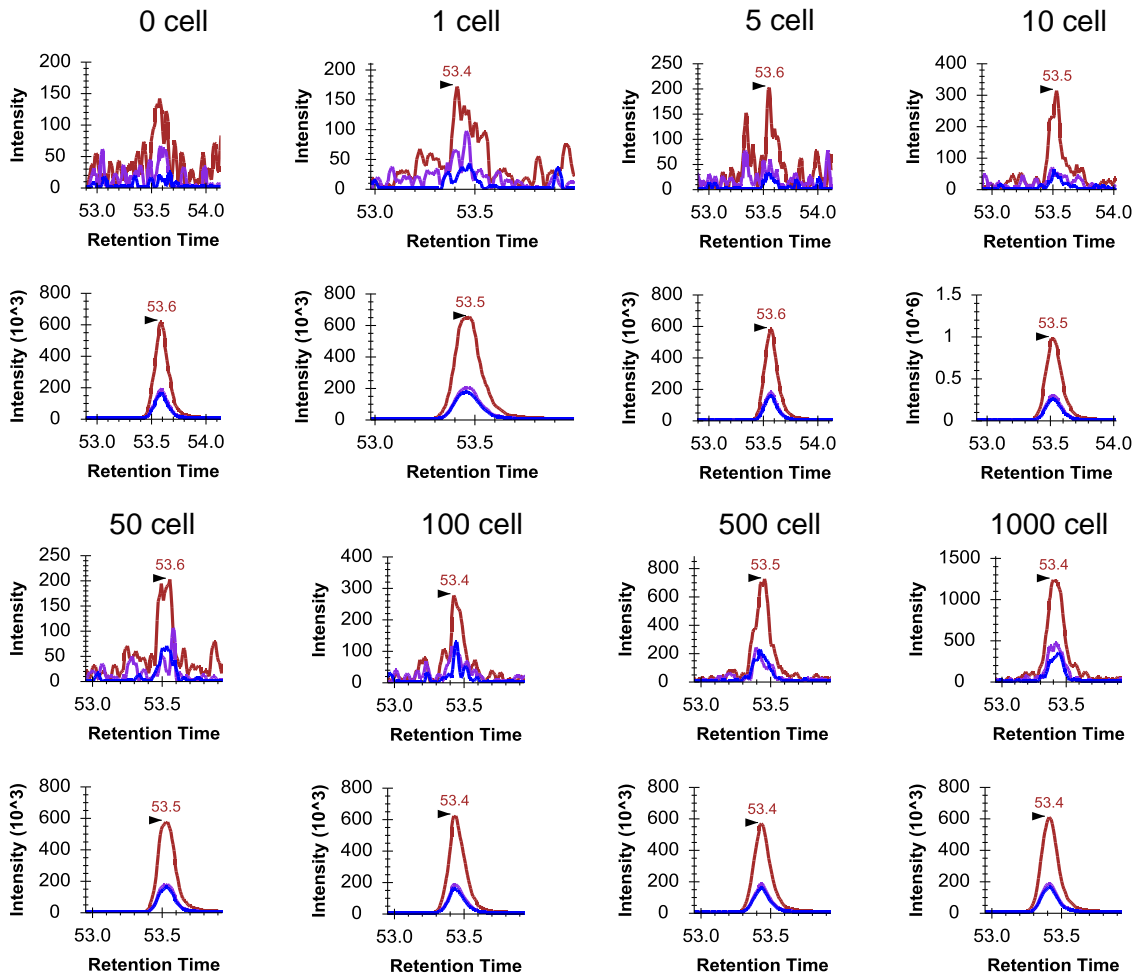

## SHC1: EAISLVCEAVPGAK (25,055)

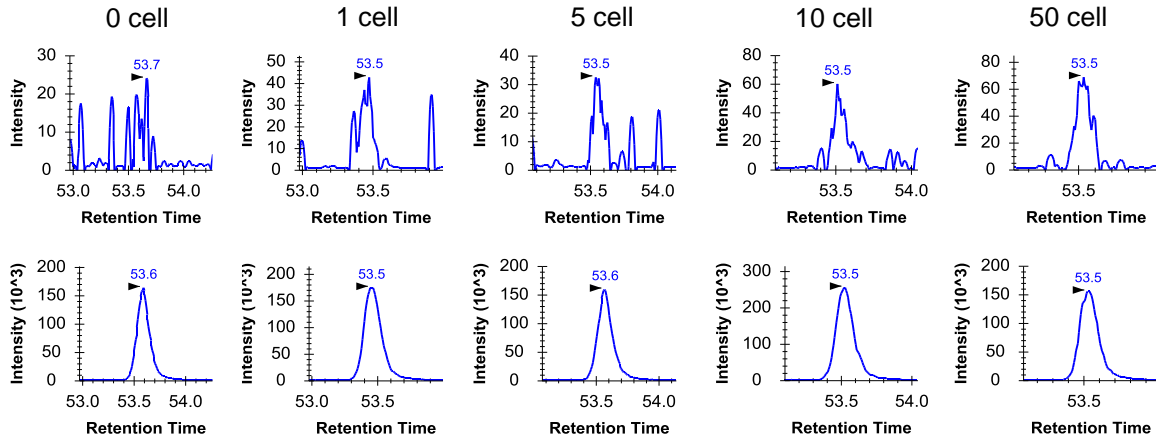

\*The best interference-free transition.

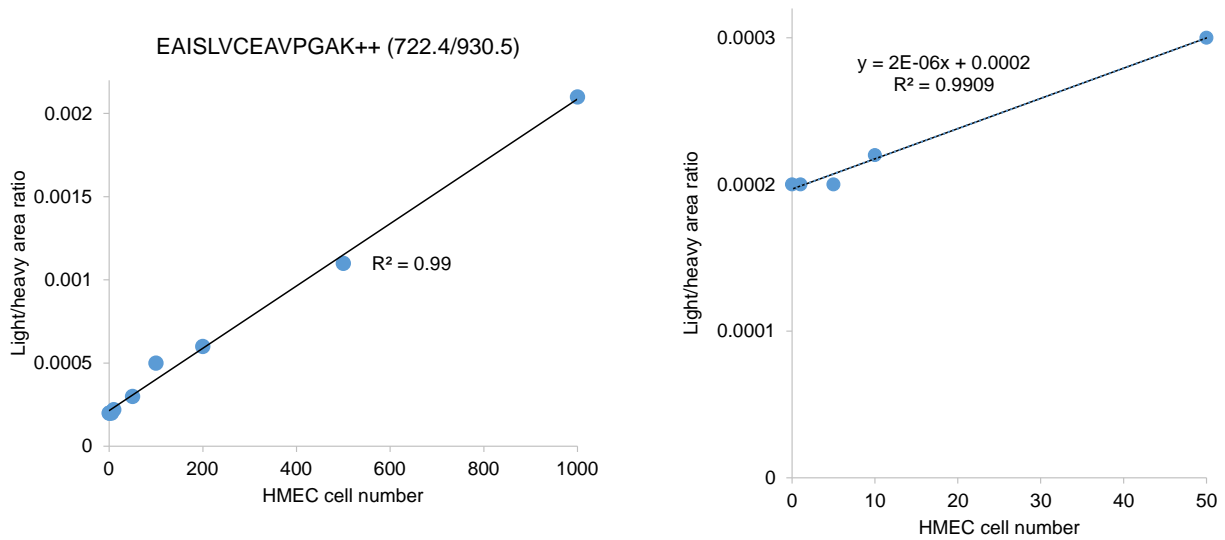

**Supplementary Figure 9.** XICs and calibration curves of EAISLVCEAVPGAK derived from SHC1 in HMEC cell equivalents at the range of 0-1000. The best interference-free transition was used for generating calibration curves.

## K/NRAS: SYGIPFIETSAK (177,780) at 10 cells

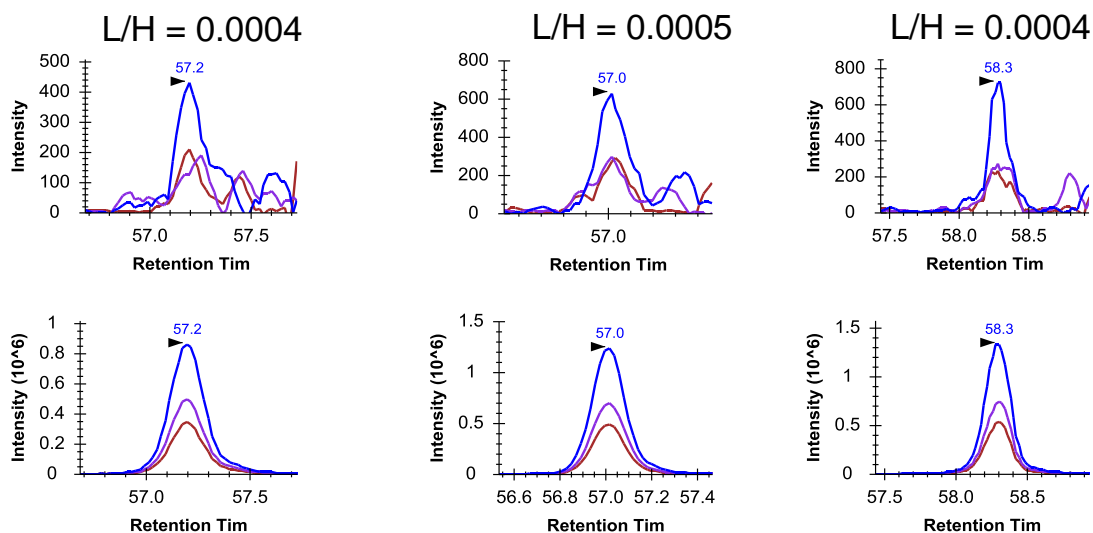

3 processing replicates (CV = 13.3%)

## H/K/NRAS: LVVVGAGGVGK (213,232) at 20 cells

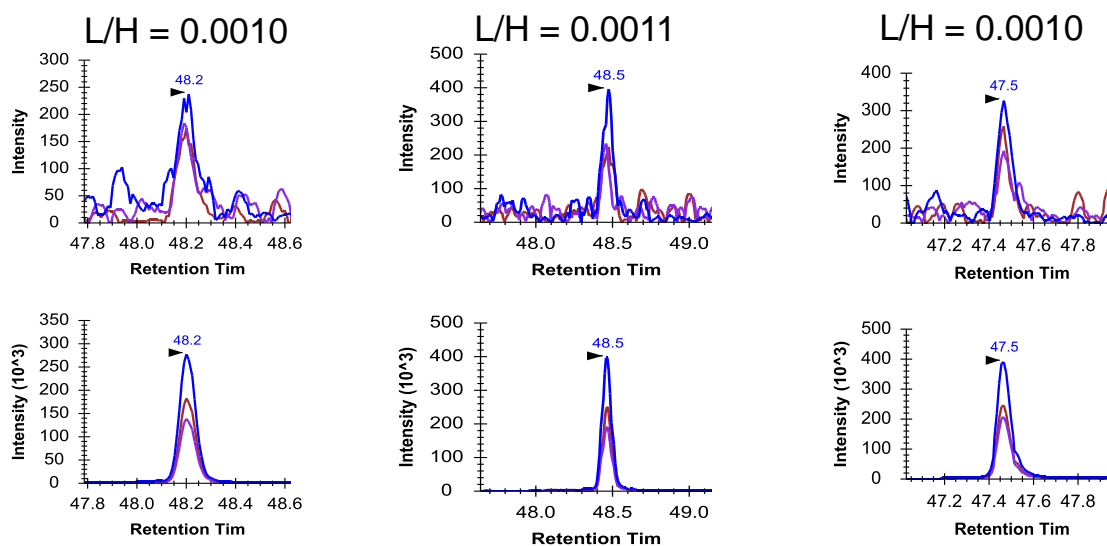

3 processing replicates (CV = 5.6%)

**Supplementary Figure 10.** Evaluation of cPRISM-SRM reproducibility with three processing replicates for SYGIPFIETSAK derived from K/NRAS at 10 cell equivalents and LVVVGAGGVGK derived from H/K/NRAS at 20 cell equivalents.

K/NRAS: SYGIPFIETSAK (copy number 177,780)

**cLC-SRM**

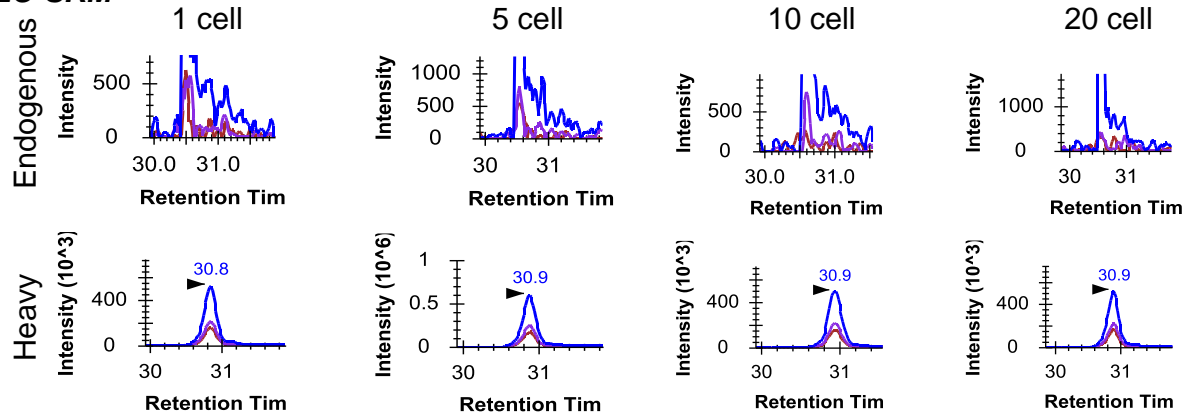

**cPRISM-SRM**

Average recovery = 190%

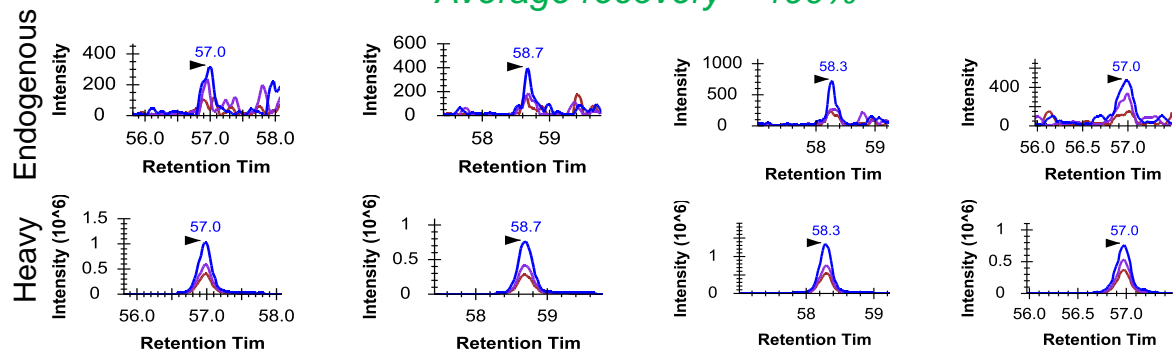

**SHC1: EAISLVCEAVPGAK**  
(copy number 25,055)

**HRAS: SFEDIHQYR**  
(copy number 68,452)

**EGFR: LTQLGTFEDHFLSLQR**  
(copy number 354,000)

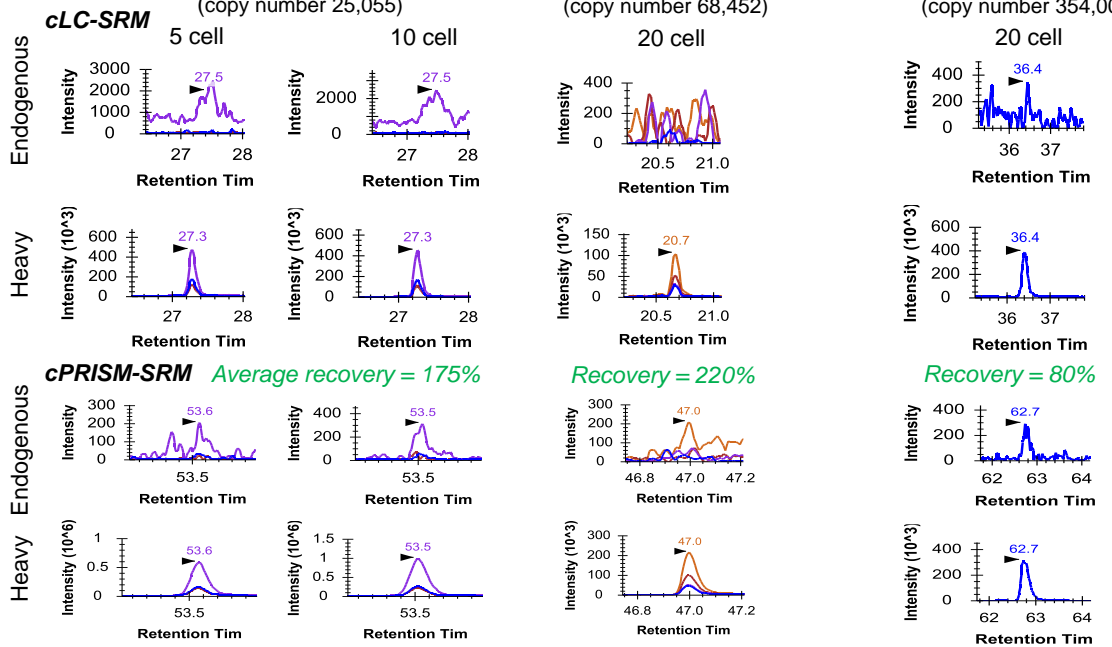

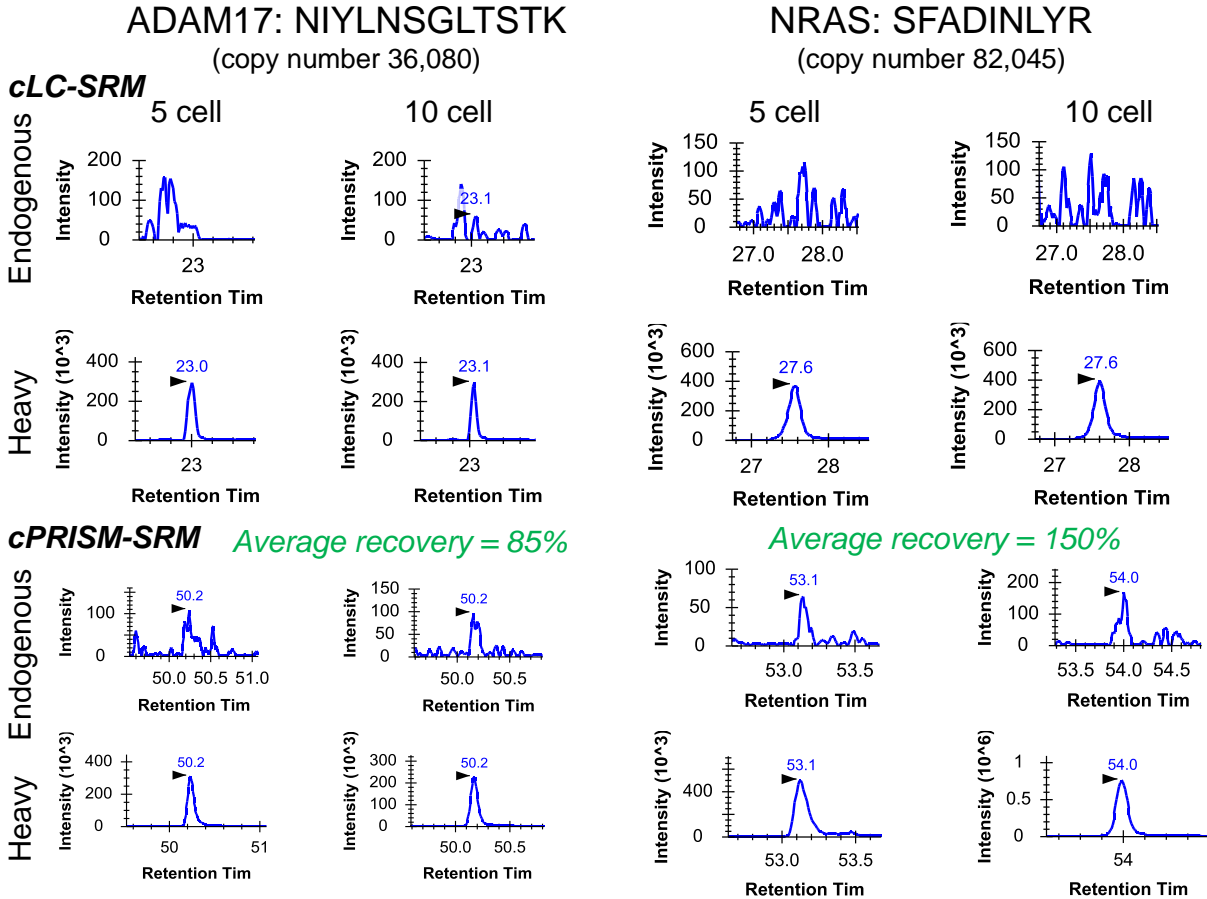

**Supplementary Figure 11.** Evaluation of the peptide recovery at small numbers of cells (1-20 cell equivalents) throughout the cPRISM-SRM workflow when compared to carrier-assisted LC-SRM (cLC-SRM) assuming ~100% recovery for LC-SRM with direct injection. The same amount of heavy internal standards (i.e., 100 fmol) and the same number of HMEC cell equivalents were used for both cPRISM-SRM and cLC-SRM analysis. The overall peptide recovery from cPRISM-SRM is equal to the SRM signal of heavy internal standards from cPRISM-SRM over that from LC-SRM. High recovery suggested less ion suppression in cPRISM-SRM than LC-SRM due to high-resolution PRISM separation for target peptide enrichment. Since the heavy internal standards essentially have the same physical and chemical properties as their corresponding light peptides with the only difference in mass, the endogenous light peptides in small numbers of cells are expected to have the same peptide recovery as the heavy internal standards at small numbers of cells.

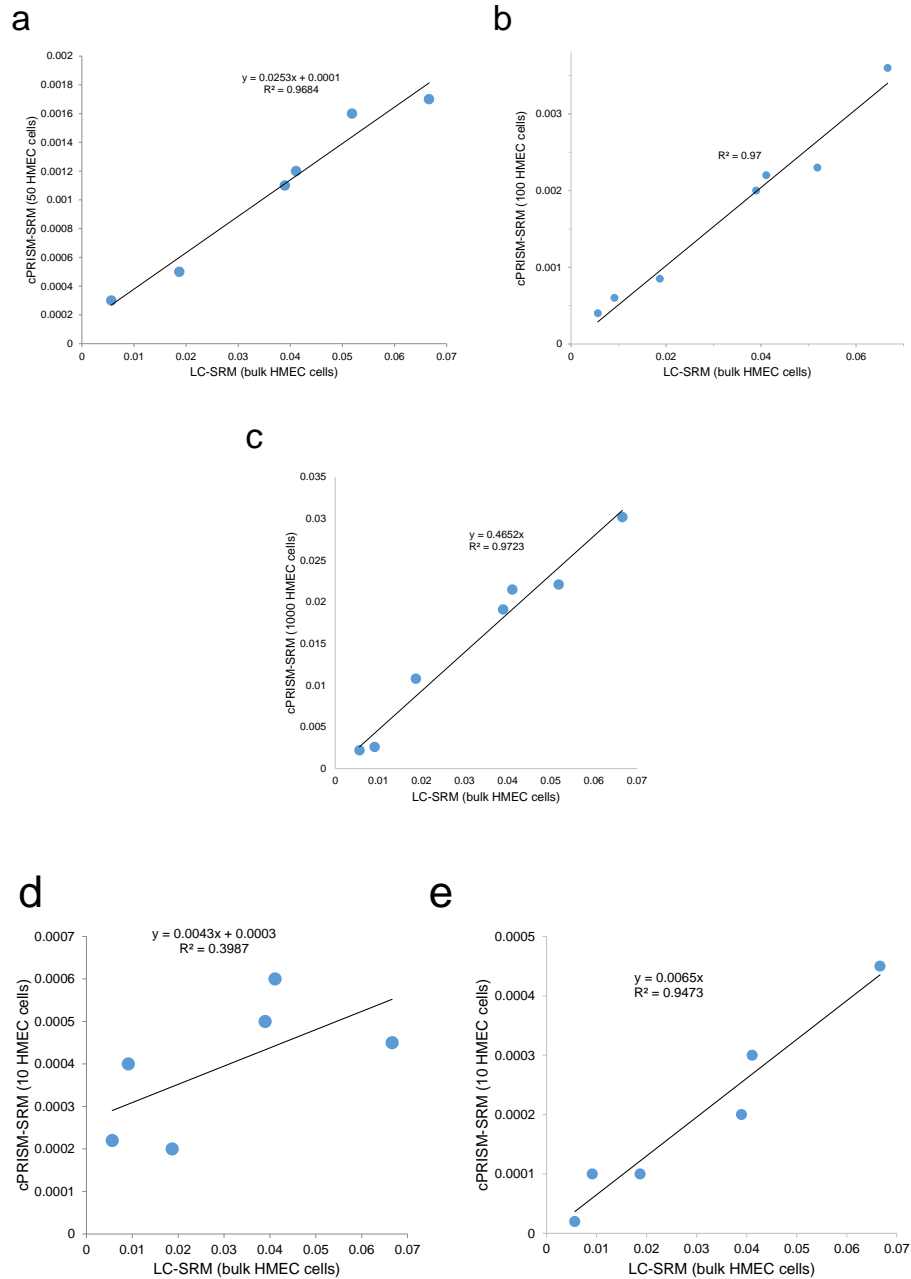

**Supplementary Figure 12.** Correlation analysis of targeted quantification of EGFR pathway proteins between a small number of HMEC cell equivalents with cPRISM-SRM and bulk HMEC cells with LC-SRM to evaluate measurement accuracy of cPRISM-SRM for a small number of cells. **(a)** 50 HMEC cell equivalents. **(b)** 100 HMEC cell equivalents. **(c)** 1000 HMEC cell equivalents. **(d)** 10 HMEC cell equivalents. **(e)** 10 HMEC cell equivalents with the subtraction of the background SRM signal from the blank sample.

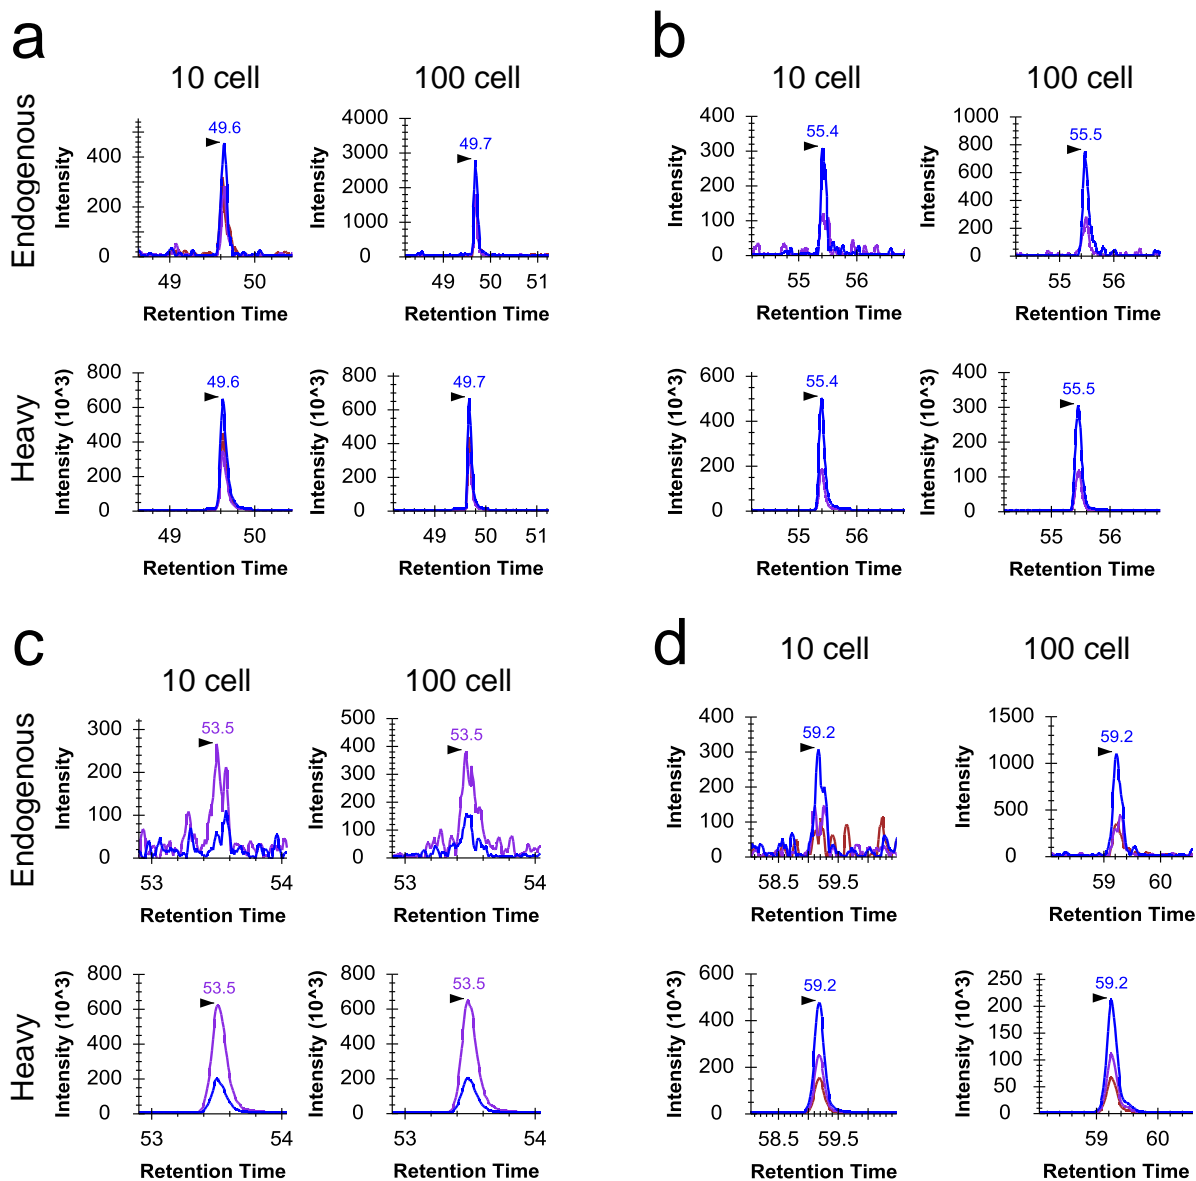

**Supplementary Figure 13.** Comparison of SRM signal between 10 and 100 intact HMEC cells measured by cPRISM-SRM. **(a)** XICs of transitions monitored for LVVVGAGGVGK derived from H/K/NRAS. **(b)** XICs of transitions monitored for SFADINLYR derived from NRAS. **(c)** XICs of transitions monitored for EAISLVCEAVPGAK derived from SHC1. **(d)** XICs of transitions monitored for SYGIPFIETSAK derived from K/NRAS.

## PEBP1 (305,750)

VLTPQTQVK

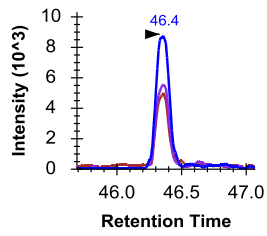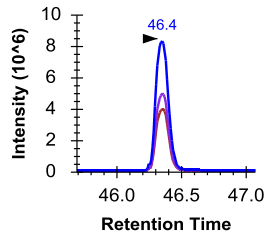

## EGFR (354,000)

LTQLGTFEDHFLSLQR

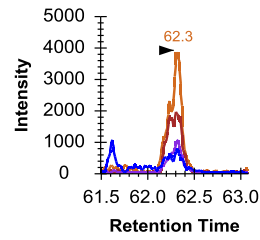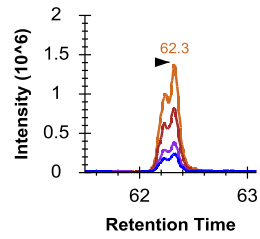

## H/K/NRAS (213,232)

LVVVGAGGVGK

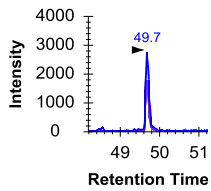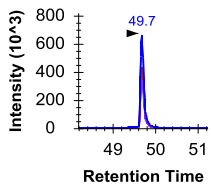

## K/NRAS (177,780)

SYGIPFIETSAK

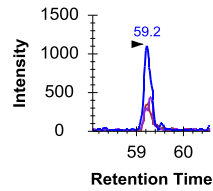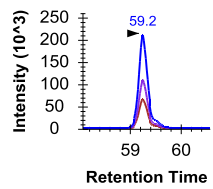

## NRAS (82,045)

SFADINLYR

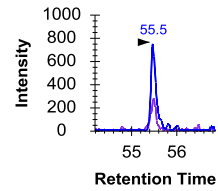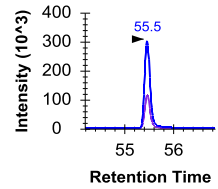

## HRAS (68,452)

SFEDIHQYR

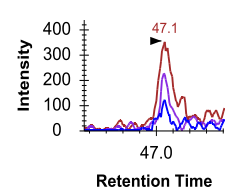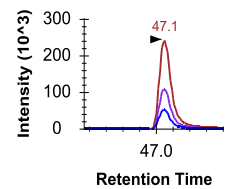



**MAPK1 (104,400)**  
VADPDHDHTGFLTEYVATR

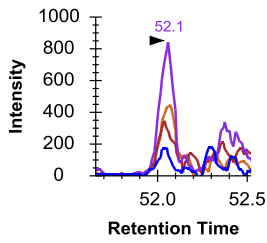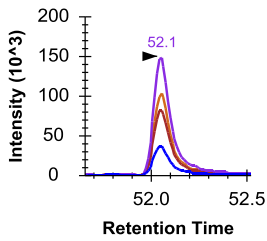

**MAP2K2 (44,630)**  
ISELGAGNGGVVTK

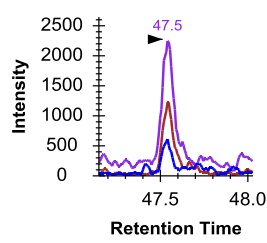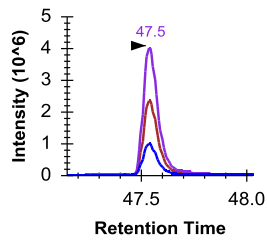

**GRB2 (43,230)**  
ATADDELSFK

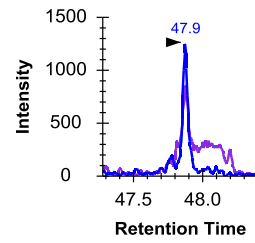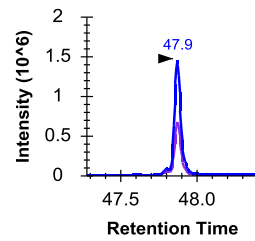

**ADAM17 (36,080)**

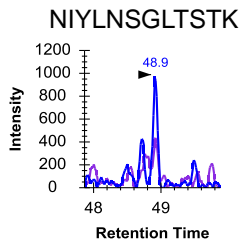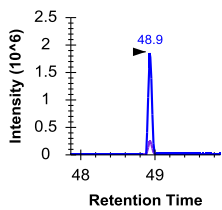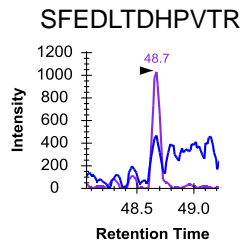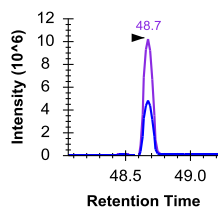

**SHC1 (25,055)**

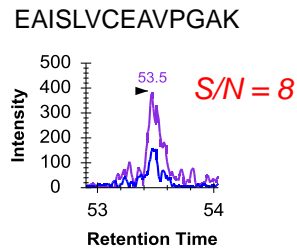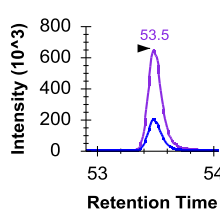

**SOS1 (3,094)**

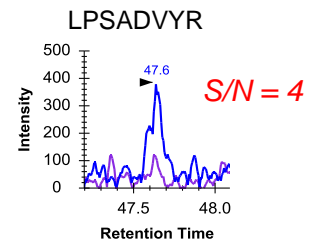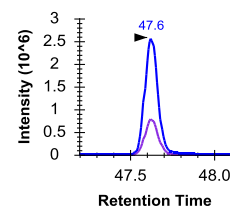

**Supplementary Figure 14.** XICs of detected EGFR pathway proteins in intact 100 HMEC cells by cPRISM-SRM (SOS1 protein with ~3000 copies per cell was detected).

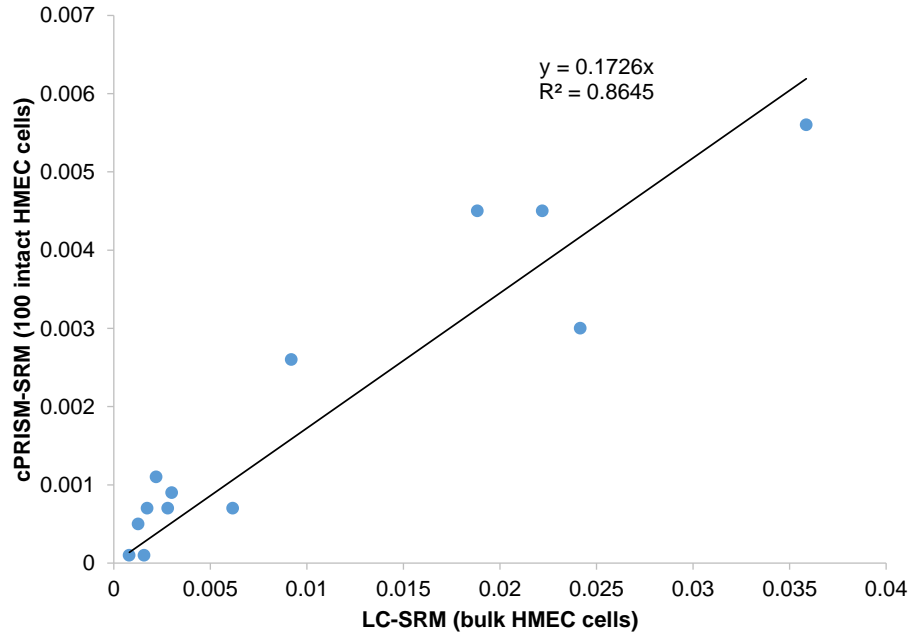

**Supplementary Figure 15.** Correlation analysis of targeted quantification of EGFR pathway proteins between 100 intact HMEC cells with cPRISM-SRM and bulk HMEC cells with LC-SRM to evaluate quantitation accuracy of cPRISM-SRM for a small number of cells.

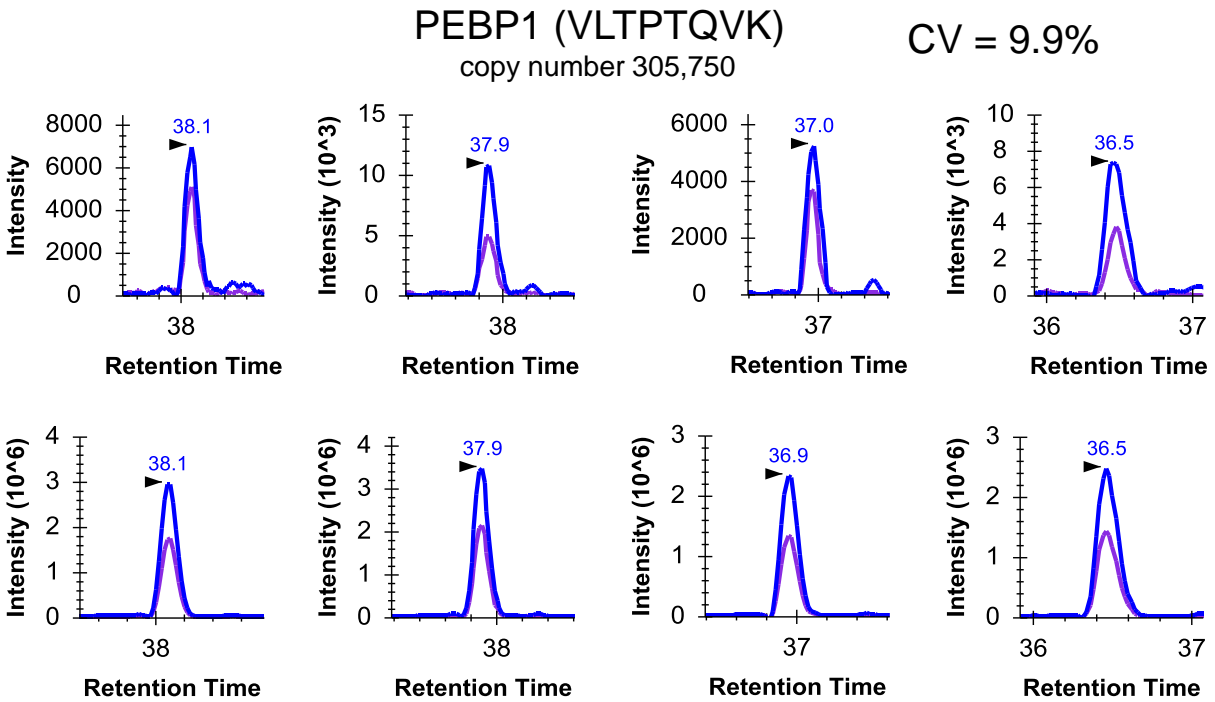

**GRB2 (ATADDELSFK)**  
copy number 43,230

CV = 15.3%

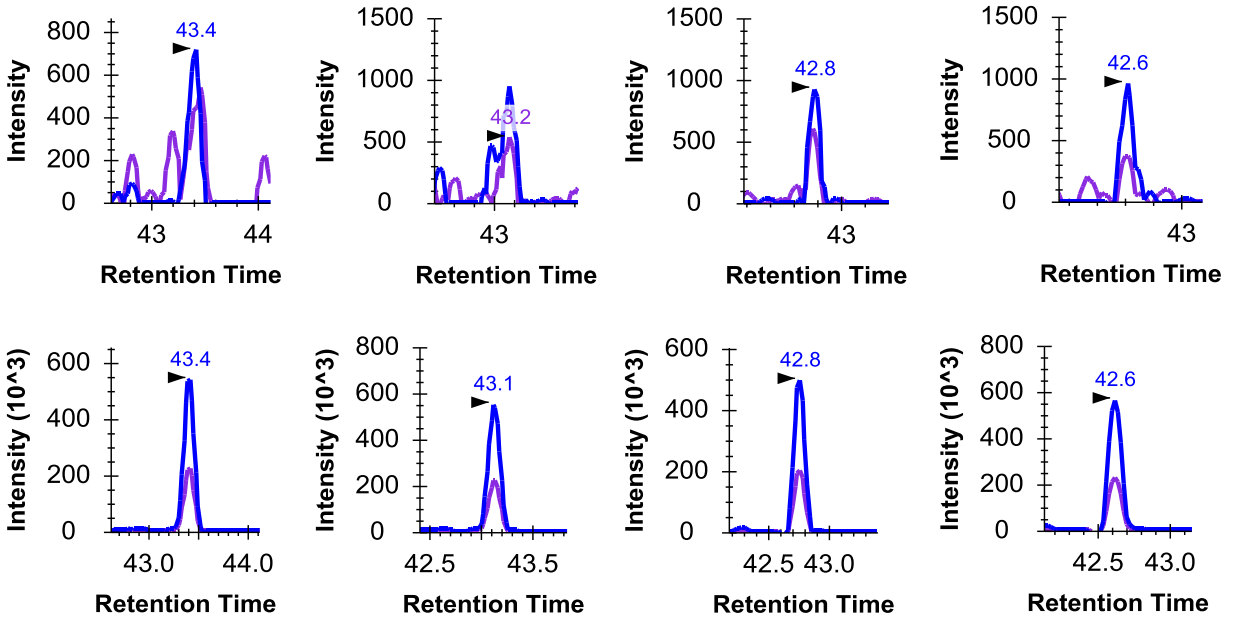

**H/K/NRAS: LVVVGAGGVGK**  
copy number 213,232

CV = 8.9%

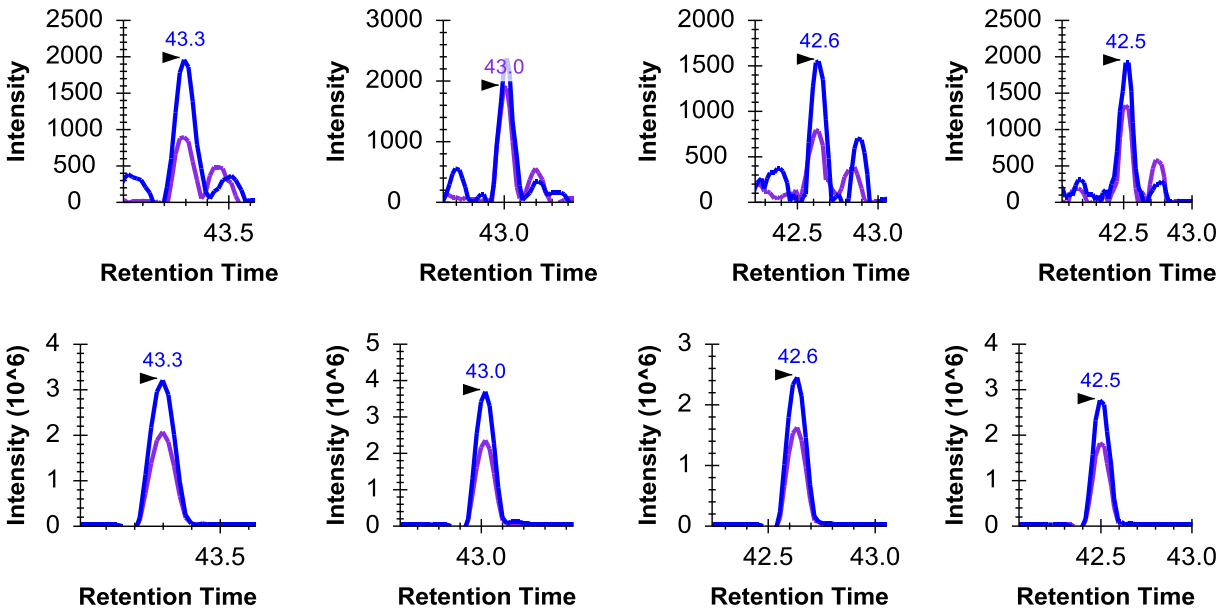

NRAS: SFADINLYR  
copy number 82,045

CV = 23.6%

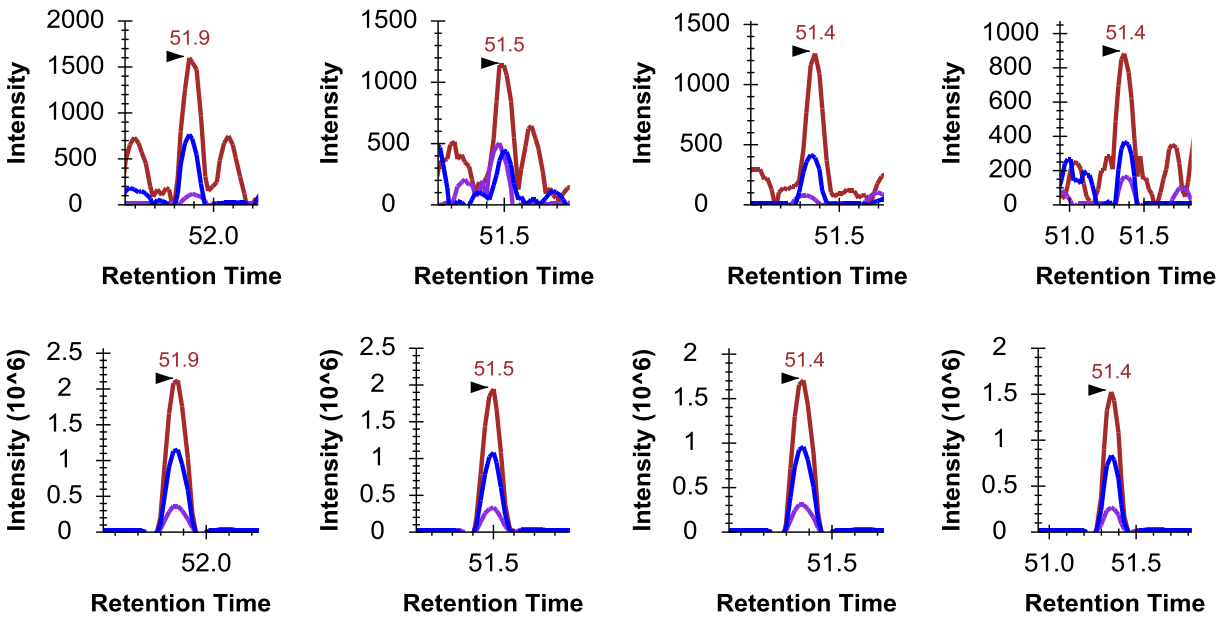

K/NRAS: SYGIPFIETSAK  
copy number 177,780

CV = 8.5%

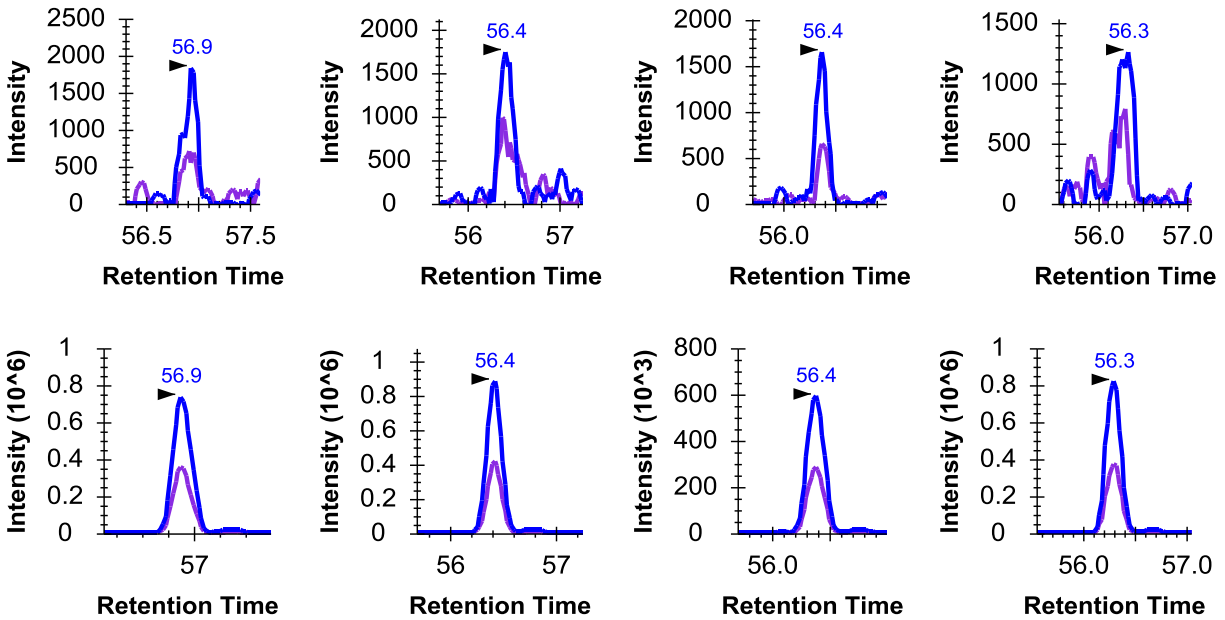

Supplementary Figure 16. Evaluation of the entire cPRISM-SRM reproducibility including sample preparation with four replicates for each target peptide at 100 intact HMEC cells.

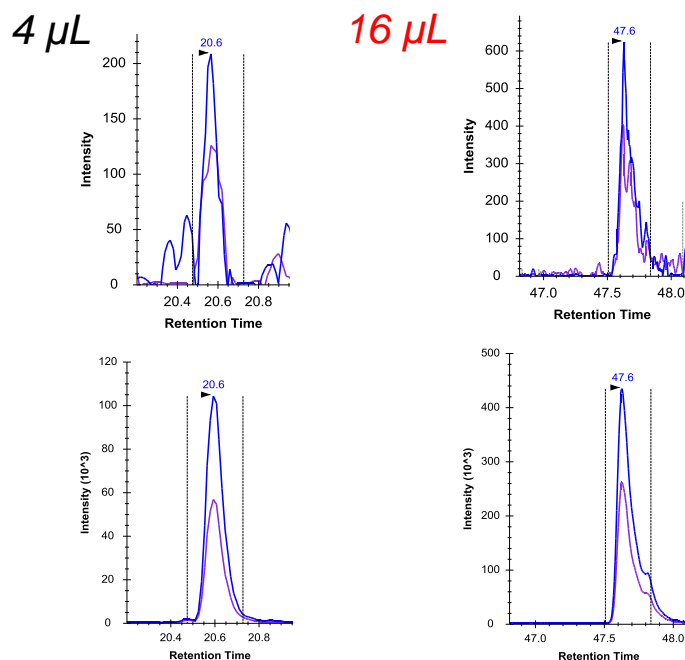

**Supplementary Figure 17.** An example of improved PRISM-SRM sensitivity at >3-fold by significantly increasing sample loading at the second dimensional LC separation from ~4 μL to ~16 μL with changing the loop from typical 5 μL to 20 μL. The total ~20 μL of PRISM fraction samples were nearly fully injected to maximize the detection sensitivity. The drawback is that there was no technical replicates for each PRISM fraction sample. As a consequence the loading time of the second dimensional LC separation was proportionally increased.

**Supplementary Table 1.** Absolute abundance (protein copies per cell) of EGFR pathway proteins in bulk HMEC cells from our previous study (Shi *et al.* Sci Signal 2016, 9:rs6). The surrogate peptides marked within red frames that represent high-, moderate-, and low-abundance were selected for cPRISM-SRM measurements across different equivalent numbers of HMEC cells (1-1000 cells) to evaluate its sensitivity.

| Protein    | Surrogate peptide    | Protein copies per HMEC cell |
|------------|----------------------|------------------------------|
| ADAM17     | NIYLNSGLTSTK         | 36080                        |
| AKT1       | FYGAEIVSALDYHSEK     | 1523                         |
| ARAF       | TQHCDPEHFPPAPANAPLQR | 11661                        |
| CBL        | GTEPIVVDPFDPK        | 11532                        |
| DUSP4      | GSVSLEQILPAEEEVK     | 266                          |
| DUSP6      | DSTNLDVLEEFGLK       | 164                          |
| EGFR       | LTQLGTFEDHFLSLQR     | 354000                       |
| ERRFI1     | NSPSLFPCAPLCER       | 5392                         |
| GAB1       | LTGDPDVLEYYK         | 3332                         |
| GRB2       | ATADDELSFK           | 43230                        |
| HRAS       | SFEDIHQYR            | 68452                        |
| H/K/NRAS   | LVVVGAGGVGK          | 213232                       |
| K/NRAS     | SYGIPFIETSAK         | 177780                       |
| KRAS       | SFEDIHHYR            | 95735                        |
| MAP2K1     | ISELGAGNGGVVFK       | 22902                        |
| MAP2K1/2K2 | LIHLEIKPAIR          | 63350                        |
| MAP2K2     | ISELGAGNGGVVTK       | 44630                        |
| MAPK1      | VADPDHDHTGFLTEYVATR  | 104400                       |

| Protein | Surrogate peptide   | Protein copies per HMEC cell |
|---------|---------------------|------------------------------|
| MAPK3   | IADPEHDHTGFLTEYVATR | 67109                        |
| NRAS    | SFADINLYR           | 82045                        |
| PDPK1   | QLLLTEGPHLYYVDPVNK  | 19910                        |
| PEBP1   | VLTPAQVK            | 305750                       |
| PIK3R1  | FSAASSDNTENLIK      | 12372                        |
| PIK3R2  | ALGATFGPLLLR        | 9839                         |
| PTPN11  | SNPGDFTLSVR         | 25110                        |
| PTPRE   | TGTFIALSNILER       | 13251                        |
| RAF1    | TISNGFGFK           | 6754                         |
| RASA1   | LLAITELLQQK         | 31197                        |
| SHC1    | EAISLVCEAVPGAK      | 25055                        |
| SHOC2   | LDSLTTLYLR          | 14429                        |
| SOS1    | EYIQPVQLR           | 3671                         |
| SOS1    | LPSADVYR            | 3094                         |
| SOS2    | LPGYSSAEYR          | 1635                         |
| SPRED1  | VPHQEENGCAFFIR      | 204                          |
| SPRY4   | LQHPLTILPIDQVK      | 219                          |

**Supplementary Table 2.** The SRM S/N ratio of endogenous peptides at 1-100 HMEC cell equivalents from bulk cell digests measured by cPRISM-SRM.

| Protein  | Surrogate peptide | Copy number per cell | S/N ratio |        |        |         |         |         |          |
|----------|-------------------|----------------------|-----------|--------|--------|---------|---------|---------|----------|
|          |                   |                      | 0 cell    | 1 cell | 5 cell | 10 cell | 20 cell | 50 cell | 100 cell |
| EGFR     | LTQLGTFEDHFLSLQR  | 354,000              | n/a       | n/a    | n/a    | n/a     | 7       | 12      | 41       |
| H/K/NRAS | LVVVGAGGVGK       | 213,232              | n/a       | 2      | 7      | 6       | 13      | 12      | 26       |
| K/NRAS   | SYGIPFIETSAK      | 177,780              | 4         | 8      | 8      | 14      | 9       | 12      | 15       |
| NRAS     | SFADINLYR         | 82,045               | 7         | n/a    | 7      | 11      | 7       | 9       | n/a      |
| HRAS     | SFEDIHQYR         | 68,452               | n/a       | n/a    | n/a    | n/a     | 2       | 5       | 7        |
| ADAM17   | NIYLNGLTSTK       | 36,080               | 2         | 4      | 5      | 6       | n/a     | n/a     | 7        |
| SHC1     | EAISLVCEAVPGAK    | 25,055               | n/a       | 3      | 5      | 8       | n/a     | 9       | 7        |

\*n/a: target peptide fractions were either not located or involved significant sample loss.

**Supplementary Table 3.** The cell line density (average number of cells per  $\mu\text{g}$ ) (Shi *et al.* Sci Signal 2016, 9:rs6).

| cell line  | date       | plate 1 - image 1 | plate 1 - image 2 | plate 2 - image 3 | plate 2 - image 4 | plate 1 - average | plate 2 - average | avg # cells/plate | total lysate volume (mL) - ELISA | lysate volume (mL)/plate | [lysate] (ug/mL) | avg protein (ug/plate) | # cells/ug protein | # cells for 8ug protein | avg # cells/mg | avg # cells/ $\mu\text{g}$ |
|------------|------------|-------------------|-------------------|-------------------|-------------------|-------------------|-------------------|-------------------|----------------------------------|--------------------------|------------------|------------------------|--------------------|-------------------------|----------------|----------------------------|
| BT-20      | 10/6/2010  | 1.470             | 1.660             | 1.320             | 1.530             | 1.565             | 1.425             | 1.495E+07         | 9.0                              | 1.286                    | 2075.201         | 2668.116               | 5603.206           | 44825.64                | 5.603E+06      | 5.603E+03                  |
| SKBR3      | 11/18/2010 | 1.030             | 1.020             | 1.170             | 1.100             | 1.025             | 1.135             | 1.080E+07         | 10.0                             | 1.429                    | 1632.153         | 2331.647               | 4631.919           | 37055.35                | 4.632E+06      | 4.632E+03                  |
| MCF-10A    | 12/8/2010  | 1.540             | 1.460             | 1.370             | 1.330             | 1.500             | 1.350             | 1.425E+07         | 9.5                              | 1.357                    | 2010.587         | 2728.654               | 5222.355           | 41778.84                | 5.222E+06      | 5.222E+03                  |
| MCF-7      | 12/9/2010  | 0.930             | 0.850             | 0.800             | 0.810             | 0.890             | 0.805             | 8.475E+06         | 9.0                              | 1.286                    | 1311.595         | 1686.336               | 5025.688           | 40205.50                | 5.026E+06      | 5.026E+03                  |
| MDA-MB-231 | 2/2/2011   | 2.170             | 1.810             | 1.840             | 2.420             | 1.990             | 2.130             | 2.060E+07         | 9.0                              | 1.286                    | 2692.304         | 3461.534               | 5951.119           | 47608.95                | 5.951E+06      | 5.951E+03                  |
| HMEC       |            |                   |                   |                   |                   |                   |                   |                   |                                  |                          |                  |                        |                    |                         | 5.287E+06      | 5.287E+03                  |
| NHDF       |            |                   |                   |                   |                   |                   |                   |                   |                                  |                          |                  |                        |                    |                         | 5.287E+06      | 5.287E+03                  |
| HS578T     |            |                   |                   |                   |                   |                   |                   |                   |                                  |                          |                  |                        |                    |                         | 4.554E+06      | 4.554E+03                  |

Based on the above information 1  $\mu\text{g}$  of total protein is equivalent to ~5000 mammalian cells (i.e., ~200 pg per mammalian cell). Assuming 50% peptide recovery from protein digestion one mammalian cell can generate ~100 pg of total peptides.
